# Supplementary material for: Antimicrobial Stewardship during COVID-19 Outbreak: A Retrospective Analysis of Antibiotic Prescriptions in the ICU across COVID-19 Waves
Source: MDPI journal article supplement (doi:10.3390/antibiotics11111517), 2022-10-30
Supplement: s1 [file s1]

**Table S1.** Definition for suspected or proven infections (based on international definitions)

| Site                                   | Criteria for diagnosis                                                                                                                                                                                                                                                                                                                                                                                                                                               |
|----------------------------------------|----------------------------------------------------------------------------------------------------------------------------------------------------------------------------------------------------------------------------------------------------------------------------------------------------------------------------------------------------------------------------------------------------------------------------------------------------------------------|
| <b>Ventilator-associated pneumonia</b> | Evolving radiological lung opacity AND identification of micro-organism in: <ol style="list-style-type: none"> <li>1. Tracheal aspirates through endotracheal tube with at least 10<sup>6</sup> colonies forming unit/mL</li> <li>2. Bronchial-alveolar lavage with at least 10<sup>4</sup> colonies forming unit/mL</li> <li>3. Protected brush with at least 10<sup>3</sup> colonies forming unit/mL</li> <li>4. Collection of abscess or pleural fluid</li> </ol> |
| <b>Pneumonia</b>                       | Evolving radiological lung opacity AND fever (body temperature > 38°C) AND identification of micro-organism by cyto-bacteriological exam with: <ol style="list-style-type: none"> <li>1. &lt; 10 epithelial cells</li> <li>2. AND &gt; 25 neutrophilic polynuclear</li> <li>3. No more than one micro-organism identified with at least 10<sup>7</sup> colonies forming unit/mL</li> </ol>                                                                           |
| <b>Intra-abdominal infection</b>       | Pus or abscess collected during surgery OR positive blood culture collected at the onset of disease                                                                                                                                                                                                                                                                                                                                                                  |
| <b>Catheter-related infection</b>      | Positive blood culture (collected by a venous puncture) AND one of the following criteria: <ol style="list-style-type: none"> <li>1. Local infection AND identification of the same micro-organism in pus and peripheral blood</li> <li>2. Positive culture of catheter AND identification of the same micro-organism in peripheral blood</li> </ol>                                                                                                                 |
| <b>Bacteremia</b>                      | At least one positive blood culture collected during fever episode excepted for negative coagulase <i>Staphylococcus</i> , <i>Bacillus sp.</i> , <i>Corynebacterium sp.</i> , <i>Propionibacterium sp.</i> , <i>Micrococcus sp.</i> for which at least two positive blood cultures collected at different sites are required                                                                                                                                         |
| <b>Tissue or skin infection</b>        | Presence of a least two of the following signs: <ol style="list-style-type: none"> <li>1. Local pain</li> <li>2. Tumefaction</li> <li>3. Local heat</li> <li>4. Sensibility</li> <li>5. Redness</li> </ol> AND at least one of the following signs: <ol style="list-style-type: none"> <li>1. Positive culture of micro-organism collected at the suspected site</li> <li>2. Micro-organism identified in blood culture</li> </ol>                                   |
| <b>Uro-genital infection</b>           | Positive urine culture (no more than two bacteria) AND fever (body temperature > 38°C) without any other suspected infection site                                                                                                                                                                                                                                                                                                                                    |
| <b>ENT infection</b>                   | Presence of at least two of the following criteria: <ol style="list-style-type: none"> <li>1. Local pain</li> <li>2. Tumefaction</li> <li>3. Local heat</li> <li>4. Redness</li> <li>5. Sensibility</li> <li>6. Abscess or pus</li> </ol> AND assessment of local inflammation by either ultrasound or CT-scan                                                                                                                                                       |

**Table S2.** Site of infection

| Site                              | n   | Frequency |
|-----------------------------------|-----|-----------|
| <b>Lung</b>                       | 158 | 88%       |
| associated bacteremia             | 4   |           |
| <b>Bacteremia</b>                 | 10  |           |
| <b>Ear, nose and throat (ENT)</b> | 5   | 3%        |
| cellulitis                        | 2   |           |
| parotiditis                       | 2   |           |
| sinusitis                         | 1   |           |
| <b>Abdominal</b>                  | 4   | 2%        |
| <b>Urinary tract</b>              | 3   | 1.7%      |

**Table S3.** Bacterial identification

| Microbiological identification                         | n  | Frequency |
|--------------------------------------------------------|----|-----------|
| Sterile                                                | 86 | 41.95%    |
| <i>S. aureus</i> oxacillin-S                           | 29 | 14.15%    |
| <i>P. aeruginosa</i> ticarcillin-S                     | 16 | 7.80%     |
| <i>Klebsiella</i> spp cefotaxime-S                     | 15 | 7.32%     |
| <i>H. influenzae</i> ampicillin-S                      | 6  | 2.93%     |
| <i>S. negative</i> coagulase oxacillin-S               | 6  | 2.93%     |
| <i>Enterobacter</i> spp cefotaxime-S                   | 5  | 2.44%     |
| <i>S. negative</i> coagulase oxacillin-R               | 5  | 2.44%     |
| <i>S. pneumoniae</i> amoxicillin-S                     | 5  | 2.44%     |
| <i>Klebsiella</i> spp ESBL                             | 4  | 1.95%     |
| <i>Corynebacteriae</i> spp                             | 3  | 1.46%     |
| <i>Enterococcus</i> spp amoxicillin-S                  | 3  | 1.46%     |
| <i>Morganella</i> spp cefotaxime-S                     | 3  | 1.46%     |
| <i>Hafnia</i> spp cefotaxime-S                         | 2  | 0.98%     |
| Other <i>Streptococcus</i> spp amoxicillin-S           | 2  | 0.98%     |
| <i>S. aureus</i> oxacillin-R                           | 2  | 0.98%     |
| <i>S. maltophilia</i> ticarcillin-R                    | 2  | 0.98%     |
| <i>Citrobacter</i> spp cefotaxime-S                    | 1  | 0.49%     |
| <i>E. coli</i> ESBL                                    | 1  | 0.49%     |
| <i>H. influenzae</i> ampicillin-R                      | 1  | 0.49%     |
| <i>M. catarrhalis</i> ampicillin-S                     | 1  | 0.49%     |
| Other Gram positive cocci                              | 1  | 0.49%     |
| Other non <i>Enterobacteriae</i> Gram-negative bacilli | 1  | 0.49%     |
| Other <i>Pseudomonas</i> spp                           | 1  | 0.49%     |
| Other <i>Streptococcus</i> spp amoxicillin-R           | 1  | 0.49%     |
| <i>S. negative</i> coagulase - without precision       | 1  | 0.49%     |
| <i>S. maltophilia</i> ticarcillin-S                    | 1  | 0.49%     |
| <i>S. pneumoniae</i> - without precision               | 1  | 0.49%     |

ESBL : extended spectrum beta-lactamase

**Table S4.** Type of empirical antibiotic treatments used and their frequencies among other antibiotics and among the population of patients receiving empirical antibiotic treatment

| Antibiotics              | n  | Frequency* (%) | Frequency in the population** (%) |
|--------------------------|----|----------------|-----------------------------------|
| Piperacillin/Tazobactam  | 95 | 47.5           | 67.4                              |
| Cefotaxime               | 35 | 17.5           | 24.8                              |
| Amikacin                 | 25 | 12.5           | 17.7                              |
| Linezolid                | 18 | 9.0            | 12.8                              |
| Vancomycin               | 5  | 2.5            | 3.5                               |
| Imipenem-Cilastatin      | 4  | 2.0            | 2.8                               |
| Cefepime                 | 3  | 1.5            | 2.1                               |
| Gentamicin               | 3  | 1.5            | 2.1                               |
| Meropenem                | 3  | 1.5            | 2.1                               |
| Levofloxacin             | 2  | 1.0            | 1.4                               |
| Amoxicillin- Clavulanate | 1  | 0.5            | 0.7                               |
| Azithromycin             | 1  | 0.5            | 0.7                               |
| Aztreonam                | 1  | 0.5            | 0.7                               |
| Ciprofloxacin            | 1  | 0.5            | 0.7                               |
| Erythromycin             | 1  | 0.5            | 0.7                               |
| Metronidazole            | 1  | 0.5            | 0.7                               |
| Ofloxacin                | 1  | 0.5            | 0.7                               |

\*Frequency of the antibiotic among all the antibiotics used

\*\*Frequency of the antibiotic in the population of patient (n=141)

**Table S5:** Frequency of bacteria detected according to the type of biological sample

| Type of sample                   | Bacteria                                               | Number | Frequency(%) |
|----------------------------------|--------------------------------------------------------|--------|--------------|
| Bronchial aspirate               | <i>S. aureus</i> methicillin-S                         | 20     | 27.40%       |
| Bronchial aspirate               | <i>Klebsiella</i> cefotaxime-S                         | 12     | 16.44%       |
| Bronchial aspirate               | <i>P. aeruginosa</i> ticarcillin-S                     | 10     | 13.70%       |
| Bronchial aspirate               | <i>H. influenzae</i> ampicillin-S                      | 6      | 8.22%        |
| Bronchial aspirate               | <i>Corynebacteriae</i> spp                             | 3      | 4.11%        |
| Bronchial aspirate               | <i>Klebsiella</i> spp ESBL                             | 3      | 4.11%        |
| Bronchial aspirate               | <i>S. pneumoniae</i> amoxicillin-S                     | 3      | 4.11%        |
| Bronchial aspirate               | <i>Enterobacter</i> spp cefotaxime-S                   | 2      | 2.74%        |
| Bronchial aspirate               | <i>S. negative</i> coagulase methicillin-R             | 2      | 2.74%        |
| Bronchial aspirate               | <i>E. coli</i> ESBL                                    | 1      | 1.37%        |
| Bronchial aspirate               | <i>Enterococcus</i> spp amoxicillin-S                  | 1      | 1.37%        |
| Bronchial aspirate               | <i>H. influenzae</i> ampicillin-R                      | 1      | 1.37%        |
| Bronchial aspirate               | <i>Hafnia</i> spp cefotaxime-S                         | 1      | 1.37%        |
| Bronchial aspirate               | <i>M. catarrhalis</i> ampicillin-S                     | 1      | 1.37%        |
| Bronchial aspirate               | <i>Morganella</i> spp cefotaxime-S                     | 1      | 1.37%        |
| Bronchial aspirate               | Other Gram Positive Cocci                              | 1      | 1.37%        |
| Bronchial aspirate               | Other non <i>Enterobacteriae</i> Gram-negative Bacilli | 1      | 1.37%        |
| Bronchial aspirate               | Other <i>Pseudomonas</i>                               | 1      | 1.37%        |
| Bronchial aspirate               | Other <i>Streptococcus</i> amoxicillin-S               | 1      | 1.37%        |
| Bronchial aspirate               | <i>S. maltophilia</i> ticarcillin-R                    | 1      | 1.37%        |
| Bronchial aspirate               | <i>S. maltophilia</i> ticarcillin-S                    | 1      | 1.37%        |
| Bronchial aspirate + Hemoculture | <i>S. aureus</i> methicillin-S                         | 1      | 100.00%      |
| Bronchial aspirate + BAL         | <i>S. aureus</i> methicillin-S                         | 1      | 100.00%      |
| Urine antigen                    | <i>S. pneumoniae</i> - without precision               | 1      | 100.00%      |
| Sputum                           | <i>Klebsiella</i> cefotaxime-S                         | 3      | 27.27%       |
| Sputum                           | <i>P. aeruginosa</i> ticarcillin-S                     | 3      | 27.27%       |
| Sputum                           | <i>S. aureus</i> methicillin-S                         | 2      | 18.18%       |
| Sputum                           | <i>Citrobacter</i> cefotaxime-S                        | 1      | 9.09%        |
| Sputum                           | <i>Enterobacter</i> spp cefotaxime-S                   | 1      | 9.09%        |
| Sputum                           | <i>S. aureus</i> methicillin-R                         | 1      | 9.09%        |
| Sputum + Bronchial aspirate      | <i>S. aureus</i> methicillin-S                         | 1      | 100.00%      |
| Urine                            | <i>Enterobacter</i> spp cefotaxime-S                   | 1      | 50.00%       |
| Urine                            | <i>P. aeruginosa</i> ticarcillin-S                     | 1      | 50.00%       |

| Type of sample      | Bacteria                                         | Number | Frequency(%) |
|---------------------|--------------------------------------------------|--------|--------------|
| Urine + Hemoculture | <i>Klebsiella</i> ESBL                           | 1      | 100.00%      |
| Hemoculture         | <i>S. negative</i> coagulase methicillin-S       | 5      | 41.67%       |
| Hemoculture         | <i>S. negative</i> coagulase methicillin-R       | 3      | 25.00%       |
| Hemoculture         | <i>Enterococcus</i> spp amoxicillin-S            | 1      | 8.33%        |
| Hemoculture         | <i>P. aeruginosa</i> ticarcillin-S               | 1      | 8.33%        |
| Hemoculture         | <i>S. aureus</i> methicillin-S                   | 1      | 8.33%        |
| Hemoculture         | <i>S. negative</i> coagulase - without precision | 1      | 8.33%        |
| BAL                 | <i>S. aureus</i> methicillin-S                   | 3      | 20.00%       |
| BAL                 | <i>Morganella</i> spp cefotaxime-S               | 2      | 13.33%       |
| BAL                 | <i>S. pneumoniae</i> amoxicillin-S               | 2      | 13.33%       |
| BAL                 | <i>Enterobacter</i> spp cefotaxime-S             | 1      | 6.67%        |
| BAL                 | <i>Enterococcus</i> spp amoxicillin-S            | 1      | 6.67%        |
| BAL                 | <i>Hafnia</i> spp cefotaxime-S                   | 1      | 6.67%        |
| BAL                 | <i>Other Streptococcus</i> amoxicillin-R         | 1      | 6.67%        |
| BAL                 | <i>Other Streptococcus</i> amoxicillin-S         | 1      | 6.67%        |
| BAL                 | <i>P. aeruginosa</i> ticarcillin-S               | 1      | 6.67%        |
| BAL                 | <i>S. aureus</i> methicillin-R                   | 1      | 6.67%        |
| BAL                 | <i>S. maltophilia</i> ticarcillin-R              | 1      | 6.67%        |
| Sinuses             | <i>S. negative</i> coagulase methicillin-S       | 1      | 100.00%      |

BAL: Bronchio-alveolar lavage, ESBL : extended spectrum beta-lactamase

**Table S6:** Details of the antibiotic de-escalation situations in which the empirical antimicrobial agent was replaced by a narrower spectrum antibiotic

| Empirical antibiotic 1  | Empirical antibiotic 2 | Empirical antibiotic 3 | Targeted antibiotic 1       | Targeted antibiotic 2         |
|-------------------------|------------------------|------------------------|-----------------------------|-------------------------------|
| Cefotaxime              | 0                      | 0                      | Amoxicillin                 | 0                             |
| Cefotaxime              | Azithromycin           | Amikacin               | Cloxacillin                 | 0                             |
| Piperacillin tazobactam | Linezolid              | 0                      | Oxacillin                   | 0                             |
| Cefotaxime              | Levofloxacin           | 0                      | Amoxicillin                 | 0                             |
| Piperacillin tazobactam | Amikacin               | 0                      | Cloxacillin                 | 0                             |
| Piperacillin tazobactam | 0                      | 0                      | Cefazolin                   | 0                             |
| Piperacillin tazobactam | Linezolid              | Amikacin               | Amoxicillin clavulanic acid | 0                             |
| Piperacillin tazobactam | Linezolid              | 0                      | Cefepime                    | 0                             |
| Imipenem-cisplatin      | 0                      | 0                      | Piperacillin tazobactam     | 0                             |
| Cefotaxime              | Linezolid              | 0                      | Amoxicillin clavulanic acid | Oxacillin                     |
| Piperacillin tazobactam | Linezolid              | 0                      | Amoxicillin                 | 0                             |
| Piperacillin tazobactam | 0                      | 0                      | Oxacillin                   | 0                             |
| Piperacillin tazobactam | Linezolid              | 0                      | Cloxacillin                 | 0                             |
| Piperacillin tazobactam | 0                      | 0                      | Oxacillin                   | 0                             |
| Piperacillin tazobactam | Linezolid              | 0                      | Oxacillin                   | 0                             |
| Piperacillin tazobactam | 0                      | 0                      | Cefotaxime                  | 0                             |
| Cefotaxime              | 0                      | 0                      | Amoxicillin                 | 0                             |
| Piperacillin tazobactam | 0                      | 0                      | Amoxicillin                 | 0                             |
| Cefotaxime              | 0                      | 0                      | Oxacillin                   | 0                             |
| Piperacillin tazobactam | Linezolid              | 0                      | Oxacillin                   | 0                             |
| Piperacillin tazobactam | Erythromycin           | Amikacin               | Amoxicillin                 | 0                             |
| Meropenem               | Gentamicin             | 0                      | Piperacillin tazobactam     | 0                             |
| Piperacillin tazobactam | 0                      | 0                      | Amoxicillin                 | 0                             |
| Vancomycin              | 0                      | 0                      | Oxacillin                   | Sulfamethoxazole trimethoprim |
| Cefotaxime              | 0                      | 0                      | Oxacillin                   | 0                             |
| Piperacillin tazobactam | Amikacin               | 0                      | Amoxicillin clavulanic acid | 0                             |
| Piperacillin tazobactam | 0                      | 0                      | Cefotaxime                  | 0                             |
| Cefotaxime              | 0                      | 0                      | Amoxicillin clavulanic acid | 0                             |
| Piperacillin tazobactam | 0                      | 0                      | Cefepime                    | 0                             |

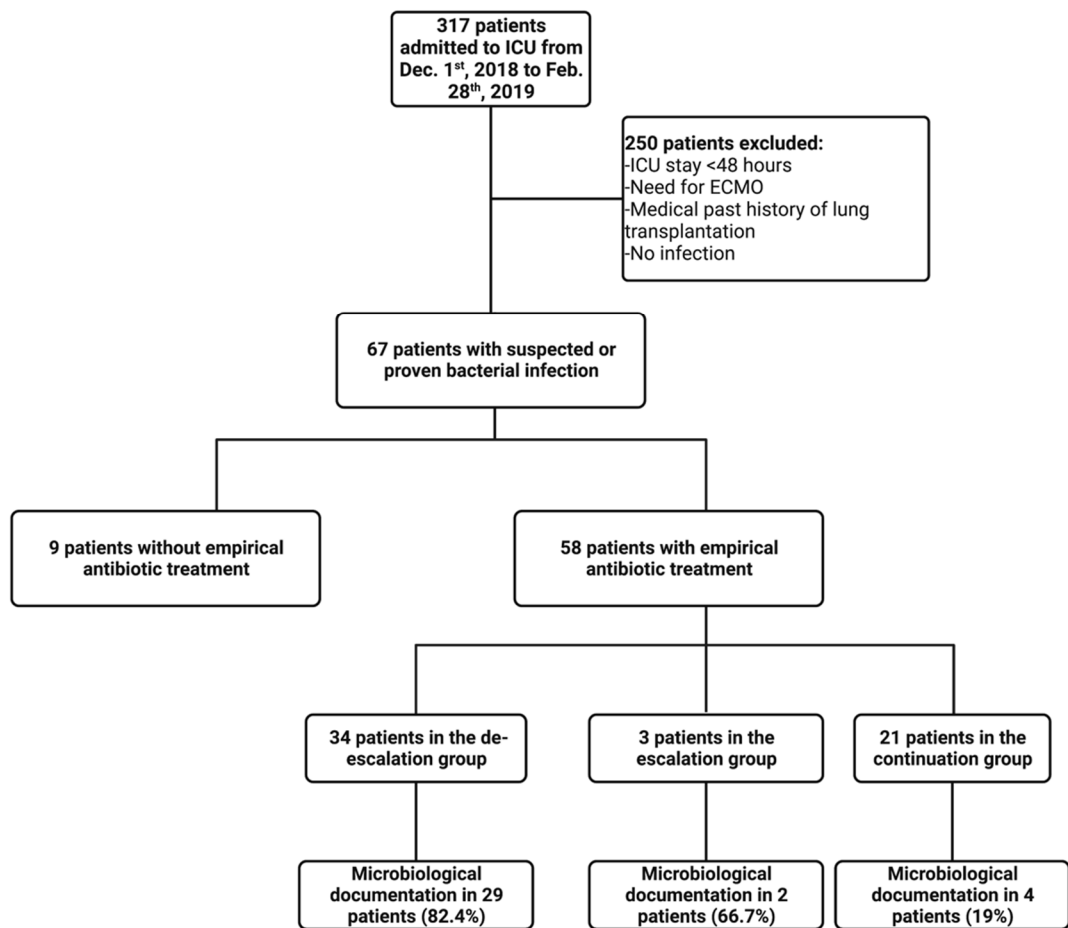

**Figure S1:** Flow chart of the control group

**Table S7:** Comparison of the COVID-19 and the control groups

|                                              | COVID-19 group<br>(N=170) | Control group<br>(N=67) | Overall<br>(N=237) | P-value |
|----------------------------------------------|---------------------------|-------------------------|--------------------|---------|
| <b>Age</b>                                   |                           |                         |                    |         |
| Mean (SD)                                    | 63.3 (12.6)               | 60.6 (16.4)             | 62.5 (13.8)        | 0.363   |
| Median [IQR]                                 | 66.0 [57.0 - 72.0]        | 64.0 [53.0 - 71.0]      | 65.0 [56.0 - 72.0] |         |
| <b>Gender</b>                                |                           |                         |                    |         |
| F                                            | 46 (27.1%)                | 24 (35.8%)              | 70 (29.5%)         | 0.241   |
| H                                            | 124 (72.9%)               | 43 (64.2%)              | 167 (70.5%)        |         |
| <b>Body Mass Index</b>                       |                           |                         |                    |         |
| Mean (SD)                                    | 30.0 (5.84)               | 24.5 (4.91)             | 28.8 (6.09)        | 0.001   |
| Median [IQR]                                 | 29.0 [26.0 - 33.4]        | 24.0 [21.0 - 27.5]      | 28.0 [24.7 - 32.0] |         |
| Missing                                      | 11 (6.5%)                 | 20 (29.9%)              | 31 (13.1%)         |         |
| <b>Obesity</b>                               |                           |                         |                    |         |
| 1                                            | 91 (53.5%)                | 56 (83.6%)              | 147 (62.0%)        | 0.001   |
| 2                                            | 71 (41.8%)                | 10 (14.9%)              | 81 (34.2%)         |         |
| Missing                                      | 8 (4.7%)                  | 1 (1.5%)                | 9 (3.8%)           |         |
| <b>Immunosuppression*</b>                    |                           |                         |                    |         |
| 0                                            | 149 (87.6%)               | 55 (82.1%)              | 204 (86.1%)        | 0.366   |
| 1                                            | 21 (12.4%)                | 12 (17.9%)              | 33 (13.9%)         |         |
| <b>Invasive procedures as outpatients</b>    |                           |                         |                    |         |
| 0                                            | 169 (99.4%)               | 66 (98.5%)              | 235 (99.2%)        | 1       |
| 1                                            | 1 (0.6%)                  | 1 (1.5%)                | 2 (0.8%)           |         |
| <b>Previous hospitalization &lt; 90 days</b> |                           |                         |                    |         |
| 0                                            | 151 (88.8%)               | 34 (50.7%)              | 185 (78.1%)        | 0.001   |
| 1                                            | 19 (11.2%)                | 33 (49.3%)              | 52 (21.9%)         |         |
| <b>Prior antibiotic course &lt; 90 days</b>  |                           |                         |                    |         |
| 0                                            | 124 (72.9%)               | 36 (53.7%)              | 160 (67.5%)        | 0.00716 |



|                                    | COVID-19 group<br>(N=170) | Control group<br>(N=67) | Overall<br>(N=237) | P-value |
|------------------------------------|---------------------------|-------------------------|--------------------|---------|
| 1                                  | 46 (27.1%)                | 31 (46.3%)              | 77 (32.5%)         |         |
| <b>Myocardial infarction</b>       |                           |                         |                    |         |
| 0                                  | 143 (84.1%)               | 57 (85.1%)              | 200 (84.4%)        | 1       |
| 1                                  | 27 (15.9%)                | 10 (14.9%)              | 37 (15.6%)         |         |
| <b>Congestive heart failure</b>    |                           |                         |                    |         |
| 0                                  | 165 (97.1%)               | 59 (88.1%)              | 224 (94.5%)        | 0.0154  |
| 1                                  | 5 (2.9%)                  | 8 (11.9%)               | 13 (5.5%)          |         |
| <b>Vascular peripheral disease</b> |                           |                         |                    |         |
| 0                                  | 161 (94.7%)               | 53 (79.1%)              | 214 (90.3%)        | 0.001   |
| 1                                  | 9 (5.3%)                  | 14 (20.9%)              | 23 (9.7%)          |         |
| <b>Stroke</b>                      |                           |                         |                    |         |
| 0                                  | 162 (95.3%)               | 62 (92.5%)              | 224 (94.5%)        | 0.601   |
| 1                                  | 8 (4.7%)                  | 5 (7.5%)                | 13 (5.5%)          |         |
| <b>Dementia</b>                    |                           |                         |                    |         |
| 0                                  | 168 (98.8%)               | 67 (100%)               | 235 (99.2%)        | 0.918   |
| 1                                  | 2 (1.2%)                  | 0 (0%)                  | 2 (0.8%)           |         |
| <b>Chronic respiratory failure</b> |                           |                         |                    |         |
| 0                                  | 148 (87.1%)               | 55 (82.1%)              | 203 (85.7%)        | 0.437   |
| 1                                  | 22 (12.9%)                | 12 (17.9%)              | 34 (14.3%)         |         |
| <b>Connective tissue disease</b>   |                           |                         |                    |         |
| 0                                  | 168 (98.8%)               | 64 (95.5%)              | 232 (97.9%)        | 0.275   |
| 1                                  | 2 (1.2%)                  | 3 (4.5%)                | 5 (2.1%)           |         |
| <b>Gastric ulcer</b>               |                           |                         |                    |         |
| 0                                  | 167 (98.2%)               | 62 (92.5%)              | 229 (96.6%)        | 0.0738  |
| 1                                  | 3 (1.8%)                  | 5 (7.5%)                | 8 (3.4%)           |         |
| <b>Mild liver disease</b>          |                           |                         |                    |         |

|                                                     | COVID-19 group<br>(N=170) | Control group<br>(N=67) | Overall<br>(N=237) | P-value |
|-----------------------------------------------------|---------------------------|-------------------------|--------------------|---------|
| 0                                                   | 166 (97.6%)               | 67 (100%)               | 233 (98.3%)        | 0.48    |
| 1                                                   | 4 (2.4%)                  | 0 (0%)                  | 4 (1.7%)           |         |
| <b>Moderate to severe liver disease</b>             |                           |                         |                    |         |
| 0                                                   | 168 (98.8%)               | 63 (94.0%)              | 231 (97.5%)        | 0.0976  |
| 1                                                   | 2 (1.2%)                  | 4 (6.0%)                | 6 (2.5%)           |         |
| <b>Kidney disease</b>                               |                           |                         |                    |         |
| 0                                                   | 160 (94.1%)               | 62 (92.5%)              | 222 (93.7%)        | 0.878   |
| 1                                                   | 10 (5.9%)                 | 5 (7.5%)                | 15 (6.3%)          |         |
| <b>Diabetes - without complications</b>             |                           |                         |                    |         |
| 0                                                   | 118 (69.4%)               | 59 (88.1%)              | 177 (74.7%)        | 0.005   |
| 1                                                   | 52 (30.6%)                | 8 (11.9%)               | 60 (25.3%)         |         |
| <b>Diabetes - with complications</b>                |                           |                         |                    |         |
| 0                                                   | 164 (96.5%)               | 62 (92.5%)              | 226 (95.4%)        | 0.34    |
| 1                                                   | 6 (3.5%)                  | 5 (7.5%)                | 11 (4.6%)          |         |
| <b>Solid cancer without metastasis &lt; 5 years</b> |                           |                         |                    |         |
| 0                                                   | 148 (87.1%)               | 54 (80.6%)              | 202 (85.2%)        | 0.289   |
| 1                                                   | 22 (12.9%)                | 13 (19.4%)              | 35 (14.8%)         |         |
| <b>Solid cancer with metastasis</b>                 |                           |                         |                    |         |
| 0                                                   | 166 (97.6%)               | 62 (92.5%)              | 228 (96.2%)        | 0.14    |
| 1                                                   | 4 (2.4%)                  | 5 (7.5%)                | 9 (3.8%)           |         |
| <b>Leukemia</b>                                     |                           |                         |                    |         |
| 0                                                   | 167 (98.2%)               | 66 (98.5%)              | 233 (98.3%)        | 1       |
| 1                                                   | 3 (1.8%)                  | 1 (1.5%)                | 4 (1.7%)           |         |
| <b>Lymphoma</b>                                     |                           |                         |                    |         |
| 0                                                   | 167 (98.2%)               | 64 (95.5%)              | 231 (97.5%)        | 0.46    |

|                                             | COVID-19 group<br>(N=170) | Control group<br>(N=67) | Overall<br>(N=237) | P-value |
|---------------------------------------------|---------------------------|-------------------------|--------------------|---------|
| 1                                           | 3 (1.8%)                  | 3 (4.5%)                | 6 (2.5%)           |         |
| <b>Hypertension</b>                         |                           |                         |                    |         |
| 0                                           | 86 (50.6%)                | 35 (52.2%)              | 121 (51.1%)        | 0.933   |
| 1                                           | 84 (49.4%)                | 32 (47.8%)              | 116 (48.9%)        |         |
| <b>Tobacco consumption</b>                  |                           |                         |                    |         |
| 1                                           | 126 (74.1%)               | 53 (79.1%)              | 179 (75.5%)        | 0.408   |
| 2                                           | 44 (25.9%)                | 13 (19.4%)              | 57 (24.1%)         |         |
| Missing                                     | 0 (0%)                    | 1 (1.5%)                | 1 (0.4%)           |         |
| <b>Charlson Score</b>                       |                           |                         |                    |         |
| Mean (SD)                                   | 4.60 (2.29)               | 5.36 (2.97)             | 4.81 (2.52)        | 0.0654  |
| Median [IQR]                                | 4.00 [3.00 - 6.00]        | 5.00 [3.00 - 7.00]      | 5.00 [3.00 - 6.00] |         |
| <b>SAPS II at ICU admission</b>             |                           |                         |                    |         |
| Mean (SD)                                   | 41.1 (15.7)               | 49.3 (16.4)             | 43.4 (16.3)        | 0.001   |
| Median [IQR]                                | 38.0 [29.0 - 49.0]        | 51.0 [36.0 - 60.0]      | 40.5 [30.8 - 53.0] |         |
| Missing                                     | 0 (0%)                    | 1 (1.5%)                | 1 (0.4%)           |         |
| <b>Acquired Resistance – Overall**</b>      |                           |                         |                    |         |
| 0                                           | 161 (94.7%)               | 54 (80.6%)              | 215 (90.7%)        | 0.00942 |
| 1                                           | 9 (5.3%)                  | 11 (16.4%)              | 20 (8.4%)          |         |
| Missing                                     | 0 (0%)                    | 2 (3.0%)                | 2 (0.8%)           |         |
| <b>Acquired resistance in rectal swabs</b>  |                           |                         |                    |         |
| 0                                           | 167 (98.2%)               | 60 (89.6%)              | 227 (95.8%)        | 0.0659  |
| 1                                           | 3 (1.8%)                  | 5 (7.5%)                | 8 (3.4%)           |         |
| Missing                                     | 0 (0%)                    | 2 (3.0%)                | 2 (0.8%)           |         |
| <b>Acquired resistance in other samples</b> |                           |                         |                    |         |
| 0                                           | 162 (95.3%)               | 54 (80.6%)              | 216 (91.1%)        | 0.005   |
| 1                                           | 8 (4.7%)                  | 11 (16.4%)              | 19 (8.0%)          |         |

|                                                   | COVID-19 group<br>(N=170) | Control group<br>(N=67) | Overall<br>(N=237) | P-value |
|---------------------------------------------------|---------------------------|-------------------------|--------------------|---------|
| Missing                                           | 0 (0%)                    | 2 (3.0%)                | 2 (0.8%)           |         |
| <b>Therapeutic changes in antibiotics</b>         |                           |                         |                    |         |
| De-escalation                                     | 47 (27.6%)                | 35 (52.2%)              | 82 (34.6%)         | 0.001   |
| Incrementation                                    | 5 (2.9%)                  | 3 (4.5%)                | 8 (3.4%)           |         |
| No change                                         | 118 (69.4%)               | 29 (43.3%)              | 147 (62.0%)        |         |
| <b>Total duration of antibiotic treatment (d)</b> |                           |                         |                    |         |
| Mean (SD)                                         | 8.86 (28.5)               | 41.1 (189)              | 18.0 (104)         | 0.0813  |
| Median [IQR]                                      | 6.00 [3.00 - 7.00]        | 7.00 [4.00 - 11.0]      | 6.00 [3.00 - 8.00] |         |
| <b>Relapse of infection</b>                       |                           |                         |                    |         |
| 0                                                 | 155 (91.2%)               | 60 (89.6%)              | 215 (90.7%)        | 0.785   |
| 1                                                 | 14 (8.2%)                 | 7 (10.4%)               | 21 (8.9%)          |         |
| Missing                                           | 1 (0.6%)                  | 0 (0%)                  | 1 (0.4%)           |         |
| <b>Recurrence of infection</b>                    |                           |                         |                    |         |
| 0                                                 | 143 (84.1%)               | 59 (88.1%)              | 202 (85.2%)        | 0.636   |
| 1                                                 | 26 (15.3%)                | 8 (11.9%)               | 34 (14.3%)         |         |
| Missing                                           | 1 (0.6%)                  | 0 (0%)                  | 1 (0.4%)           |         |
| <b>Mechanical ventilation (d)</b>                 |                           |                         |                    |         |
| Mean (SD)                                         | 21.9 (16.5)               | 38.1 (202)              | 25.9 (101)         | 0.001   |
| Median [IQR]                                      | 17.0 [11.0 - 30.0]        | 7.50 [3.00 - 15.5]      | 14.0 [8.00 - 26.0] |         |
| Missing                                           | 13 (7.6%)                 | 15 (22.4%)              | 28 (11.8%)         |         |
| <b>ICU length of stay (d)</b>                     |                           |                         |                    |         |
| Mean (SD)                                         | 27.7 (19.7)               | 13.8 (13.4)             | 23.8 (19.2)        | 0.001   |
| Median [IQR]                                      | 21.0 [15.0 - 35.5]        | 9.00 [4.00 - 18.0]      | 18.0 [11.0 - 29.0] |         |
| Missing                                           | 0 (0%)                    | 2 (3.0%)                | 2 (0.8%)           |         |
| <b>Hospital length of stay (d)</b>                |                           |                         |                    |         |
| Mean (SD)                                         | 35.1 (21.3)               | 31.5 (26.8)             | 34.1 (22.9)        | 0.0391  |

|                                         | COVID-19 group<br>(N=170) | Control group<br>(N=67) | Overall<br>(N=237) | P-value |
|-----------------------------------------|---------------------------|-------------------------|--------------------|---------|
| Median [IQR]                            | 29.5 [20.0 - 46.0]        | 25.0 [11.0 - 40.5]      | 29.0 [18.0 - 45.0] |         |
| Missing                                 | 0 (0%)                    | 3 (4.5%)                | 3 (1.3%)           |         |
| <b>Sepsis to ICU discharge (d)</b>      |                           |                         |                    |         |
| Mean (SD)                               | 28.1 (20.3)               | 11.1 (8.16)             | 26.1 (20.1)        | 0.001   |
| Median [IQR]                            | 21.0 [15.0 - 35.5]        | 8.50 [5.00 - 16.3]      | 20.0 [12.8 - 32.0] |         |
| Missing                                 | 0 (0%)                    | 45 (67.2%)              | 45 (19.0%)         |         |
| <b>Sepsis to hospital discharge (d)</b> |                           |                         |                    |         |
| Mean (SD)                               | 34.7 (23.7)               | 20.5 (14.6)             | 33.1 (23.3)        | 0.00335 |
| Median [IQR]                            | 29.0 [19.0 - 43.8]        | 16.0 [8.00 - 32.0]      | 28.0 [17.0 - 42.5] |         |
| Missing                                 | 0 (0%)                    | 46 (68.7%)              | 46 (19.4%)         |         |
| <b>Limitation of therapeutics (d)</b>   |                           |                         |                    |         |
| 0                                       | 156 (91.8%)               | 57 (85.1%)              | 213 (89.9%)        | 0.194   |
| 1                                       | 14 (8.2%)                 | 10 (14.9%)              | 24 (10.1%)         |         |
| <b>ICU mortality</b>                    |                           |                         |                    |         |
| 0                                       | 124 (72.9%)               | 51 (76.1%)              | 175 (73.8%)        | 0.736   |
| 1                                       | 46 (27.1%)                | 16 (23.9%)              | 62 (26.2%)         |         |
| <b>In-Hospital mortality</b>            |                           |                         |                    |         |
| 0                                       | 123 (72.4%)               | 49 (73.1%)              | 172 (72.6%)        | 1       |
| 1                                       | 47 (27.6%)                | 18 (26.9%)              | 65 (27.4%)         |         |
| <b>Day 28 Mortality</b>                 |                           |                         |                    |         |
| 0                                       | 124 (72.9%)               | 50 (74.6%)              | 174 (73.4%)        | 0.919   |
| 1                                       | 46 (27.1%)                | 17 (25.4%)              | 63 (26.6%)         |         |
| <b>Day 90 Mortality</b>                 |                           |                         |                    |         |
| 0                                       | 123 (72.4%)               | 47 (70.1%)              | 170 (71.7%)        | 0.858   |
| 1                                       | 47 (27.6%)                | 20 (29.9%)              | 67 (28.3%)         |         |

SD: standard deviation, IQR: interquartile range, BMI: body mass index, ICU: intensive care unit, MDR: multidrug resistant, SAPS II: Simplified Acute Physiology Score, AIDS: acquired immunodeficiency syndrome, (d): days

Charlson score: age > 40 years, myocardial infarction, congestive heart failure, vascular peripheral disease, stroke, dementia, respiratory insufficiency, rheumatologic disease, gastric ulcer, liver disease, kidney disease, diabetes, central palsy, solid cancer with or without metastasis, leukemia, lymphoma, AIDS

\*Immunosuppression: treatment with corticosteroid, chemotherapy, immunotherapy, or other immunosuppressive drugs, history of transplant, blood disease resulting in immunosuppression

\*\* Overall acquired resistance was defined as the appearance of a MDR bacteria either in rectal swabs or other samples.
